# Supplementary material for: Asymmetric division triggers cell-specific gene expression through coupled capture and stabilization of a phosphatase
Source: eLife journal article supplement (doi:10.7554/elife.08145), 2015-10-14

**A**

time (min):        0   1   2   4   7   10 15 20 30 60  
untagged SpoIIIE

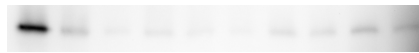**B**

time (min):        0   1   2   4   7   10 15 20 30 60        0   1   2   4   7   10 15 20 30 60  
*P<sub>lac</sub>* untagged SpoIIIE        *ftsH<sup>+</sup>*        *ΔftsH*

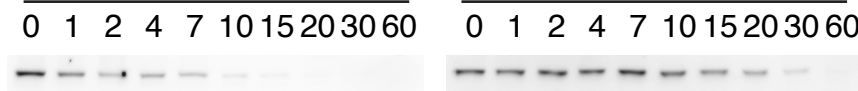**C**

time (min):        0   1   2   4   7   10 15 20 30 60        0   1   2   4   7   10 15 20 30 60  
                                 *ftsH<sup>+</sup>*        *ΔftsH*

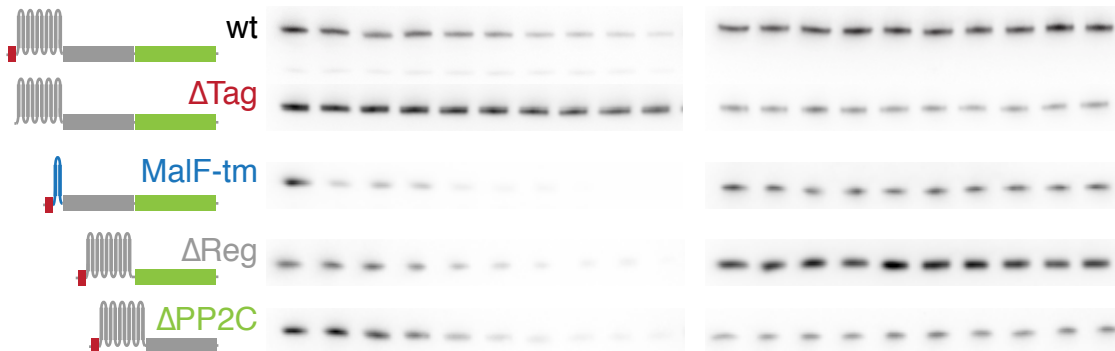

Supplement: supp [file elife-08145-supp-v1.zip]
