# Supplementary material for: Asymmetric division triggers cell-specific gene expression through coupled capture and stabilization of a phosphatase
Source: eLife journal article supplement (doi:10.7554/elife.08145), 2015-10-14
Supplement: supp [file elife-08145-supp-v1.zip]

| Strain                                                                                                               | SpoIIE variant                | Spores/ml          |
|----------------------------------------------------------------------------------------------------------------------|-------------------------------|--------------------|
| RL3                                                                                                                  | wildtype                      | $3.95 \times 10^8$ |
| RL5876                                                                                                               | SpoIIE-YFP                    | $3.94 \times 10^8$ |
| RL5877                                                                                                               | SpoIIE-3XFLAG                 | $4.07 \times 10^8$ |
| RL5895                                                                                                               | K356D                         | <1                 |
| RL5896                                                                                                               | S361F                         | $3.00 \times 10^4$ |
| RL5897                                                                                                               | C399A                         | $2.50 \times 10^7$ |
| RL5898                                                                                                               | C402A                         | $1.00 \times 10^7$ |
| RL5899                                                                                                               | C408A W409A                   | $3.38 \times 10^7$ |
| RL5900                                                                                                               | C446A                         | $1.00 \times 10^7$ |
| RL5901                                                                                                               | I538A                         | $7.00 \times 10^5$ |
| RL5902                                                                                                               | L646K                         | <1                 |
| RL5903                                                                                                               | D686A                         | 5                  |
| RL5904                                                                                                               | Q483A                         | 126                |
| RL5905                                                                                                               | V490K                         | 68                 |
| RL5906                                                                                                               | D628A                         | <1                 |
| RL5907                                                                                                               | E639K                         | $6.00 \times 10^2$ |
| RL5908                                                                                                               | E675A                         | $3.60 \times 10^4$ |
| RL5909                                                                                                               | S699D                         | <1                 |
| RL6052                                                                                                               | Tag <sup>SpoIIE</sup> -MalFtm | $3.90 \times 10^6$ |
| RL6053                                                                                                               | MalFtm                        | $9.00 \times 10^5$ |
| RL5936                                                                                                               | K356D T353I                   | $4.40 \times 10^7$ |
| RL5937                                                                                                               | T353I S361F                   | <2000              |
| RL5938                                                                                                               | T353I V490K                   | <1                 |
| RL5939                                                                                                               | K356D V697A                   | $4.70 \times 10^7$ |
| RL5940                                                                                                               | S361F V697A                   | $2.30 \times 10^8$ |
| RL5941                                                                                                               | V490K V697A                   | $1.10 \times 10^7$ |
| RL5942                                                                                                               | Q483A V697A                   | $1.80 \times 10^8$ |
| <b>Amino acid substitutions with wild type sporulation efficiency</b>                                                |                               |                    |
| E428A, R477A, K552A, Q508A, Y529K, D537K, E539K, D493K, L479F, K448A, E509A, R350A, R350D, T353A, E750A, T416A Y417A |                               |                    |

**Figure 4-figure supplement 1: Sporulation efficiency of SpoIIE mutants.** Cultures of indicated strains with were grown in DSM for 28 hours at 37°C followed by heat killing for 20 minutes at 85°C. The number of spores was determined by counting viable cells.
