# Supplementary figures and images for: Asymmetric division triggers cell-specific gene expression through coupled capture and stabilization of a phosphatase
Source: eLife journal article supplement (doi:10.7554/elife.08145), 2015-10-14

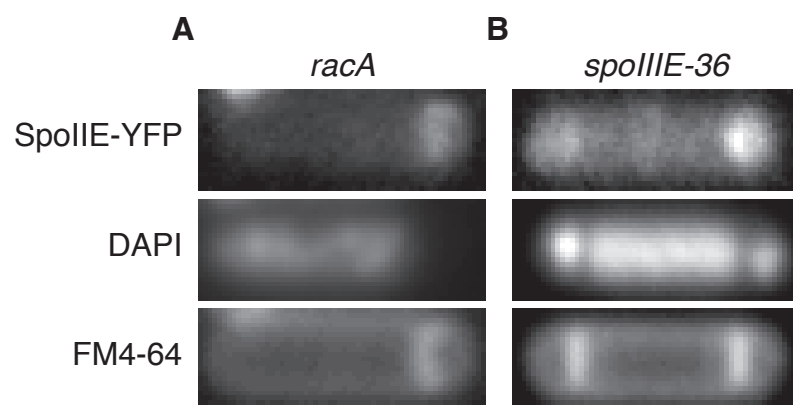

Supplement: supp [file elife-08145-supp-v1.zip]

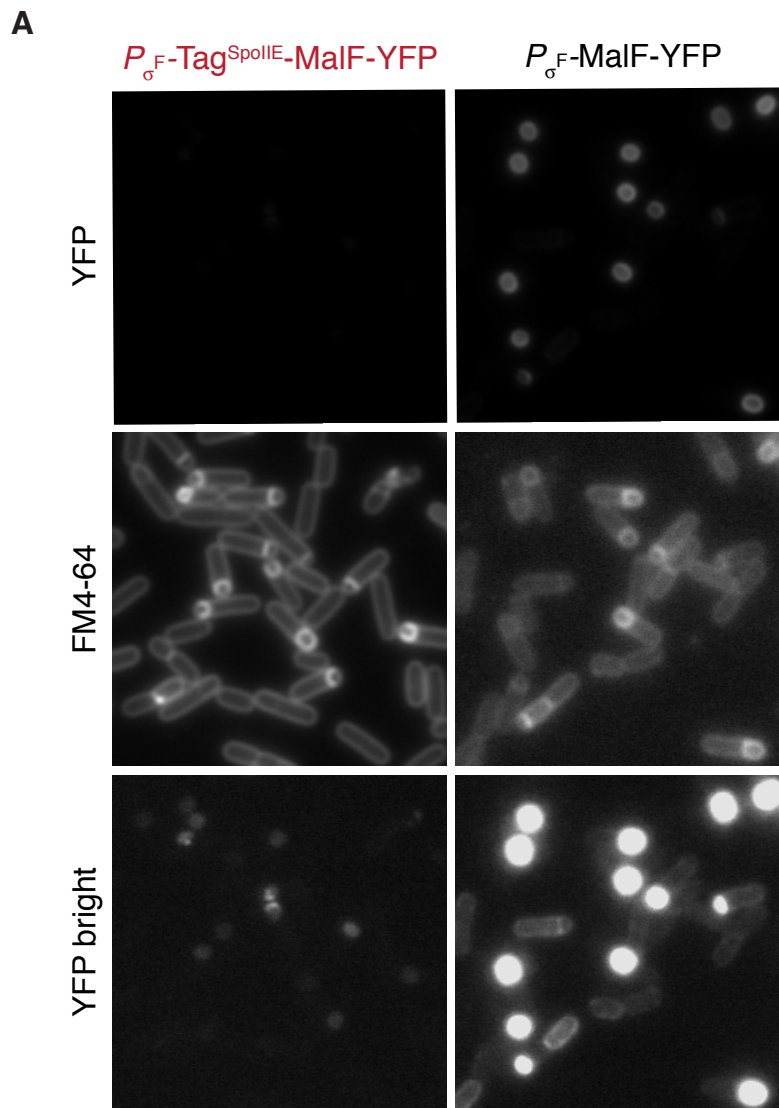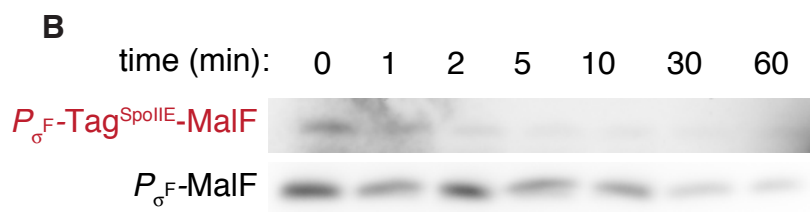

Figure 3-figure supplement 1

Supplement: supp [file elife-08145-supp-v1.zip]

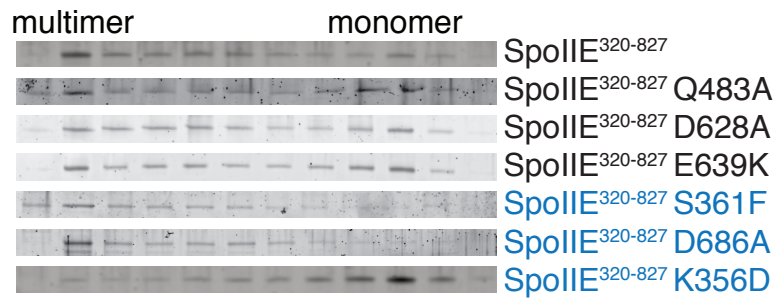

Figure 7-figure supplement-1

Supplement: supp [file elife-08145-supp-v1.zip]

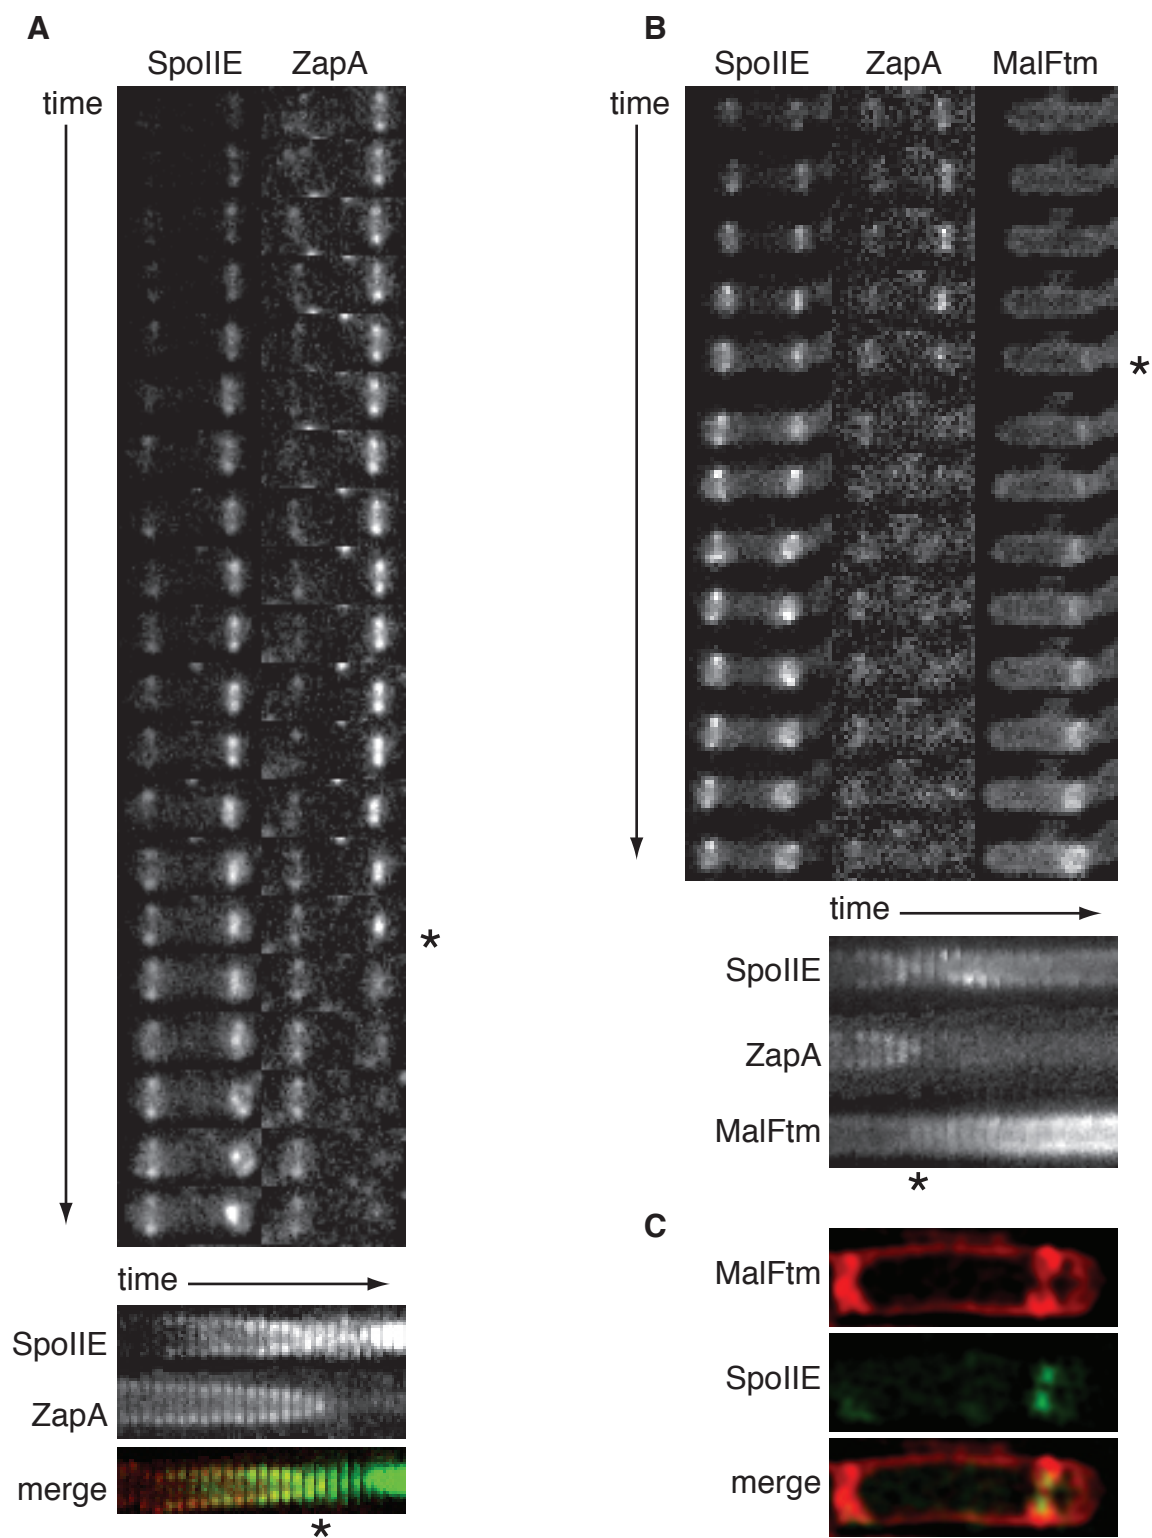

Fig.1-figure supplement-1

Supplement: supp [file elife-08145-supp-v1.zip]

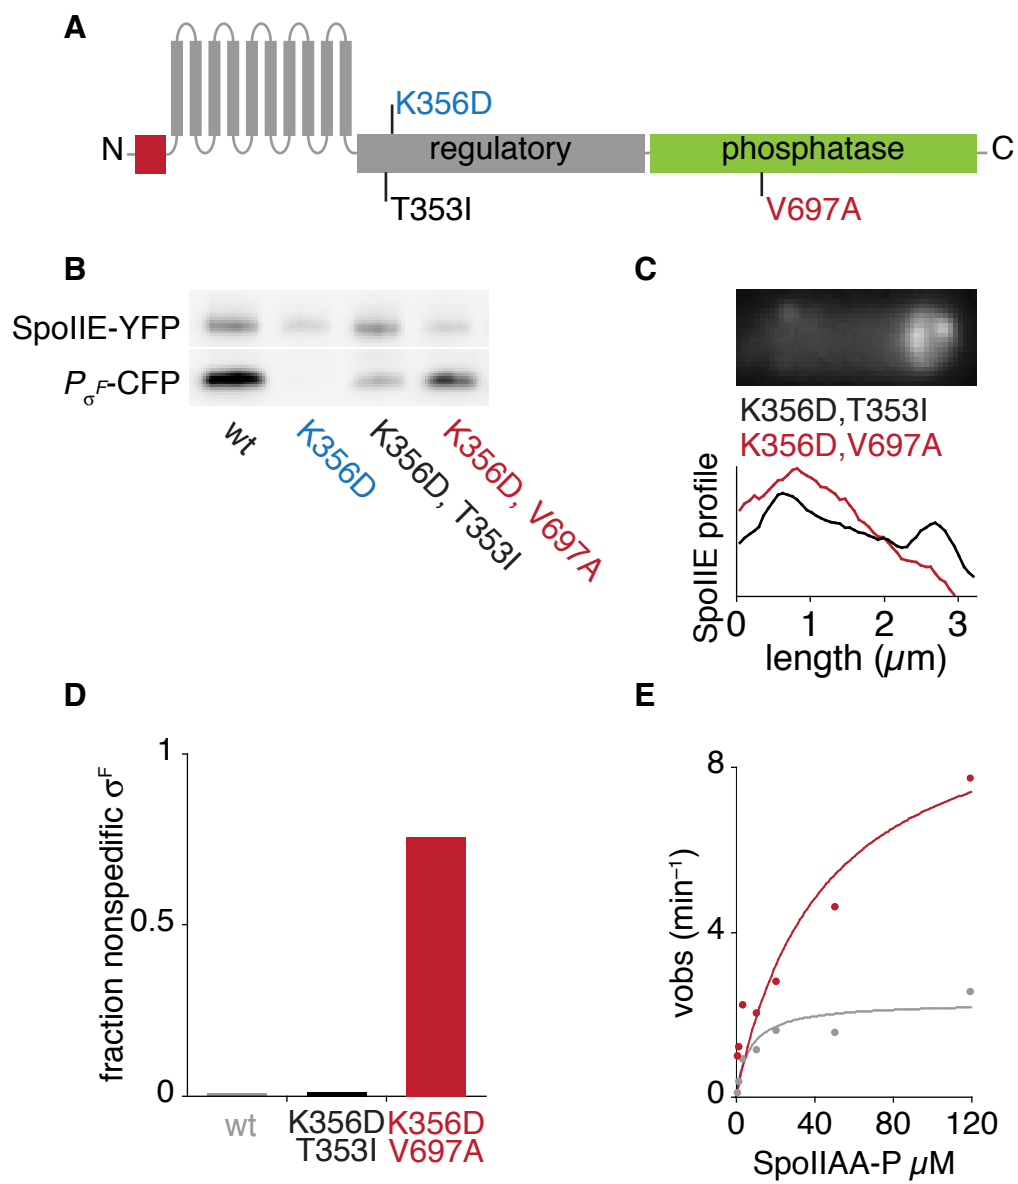

Figure 4-figure supplement-2

Supplement: supp [file elife-08145-supp-v1.zip]
